# Supplementary material for: Anti-Cancer and Anti-Oxidant Bioactive Metabolites from Aspergillus fumigatus WA7S6 Isolated from Marine Sources: In Vitro and In Silico Studies
Source: MDPI journal article supplement (doi:10.3390/microorganisms12010127), 2024-01-08
Supplement: s1 [file s1]

# Anti-Cancer and Anti-Oxidant Bioactive Metabolites from *Aspergillus fumigatus* WA7S6 Isolated from Marine Sources: In Vitro and In Silico Studies

Mervat G. Hassan <sup>1</sup>, Waleed A. Elmezain <sup>1</sup>, Dina M. Baraka <sup>1</sup>, Sabah A. AboElmaaty <sup>1</sup>, Ahmed Elhassanein <sup>2,\*</sup>,  
Riyad Mohammed Ibrahim <sup>2</sup> and Ahmed A. Hamed <sup>3,\*</sup>

<sup>1</sup> Botany and Microbiology Department, Faculty of Science, Benha University, Benha 33516, Egypt; mervat.hassan@fsc.bu.edu.eg (M.G.H.); waledahmed89@yahoo.com (W.A.E.);

dina.barakah@fsc.bu.edu.eg (D.M.B.); sabah.alsayed@fsc.bu.edu.eg (S.A.A.)

<sup>2</sup> Department of Mathematics, College of Science, University of Bisha, P.O. Box 551, Bisha 61922, Saudi Arabia; rmebrahim@ub.edu.sa

<sup>3</sup> Microbial Chemistry Department, National Research Centre, El-Buhouth St. 33, Cairo 12622, Egypt

\* Correspondence: el\_hassanein@yahoo.com (A.E.); ahmedshalbio@gmail.com (A.A.H.)

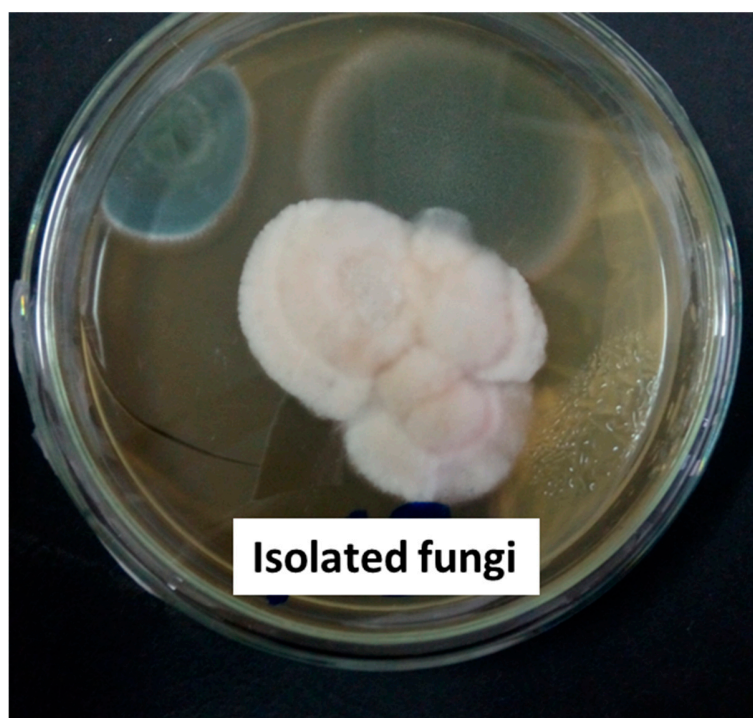

**Supplementary S1.** Morphology of some isolated fungi

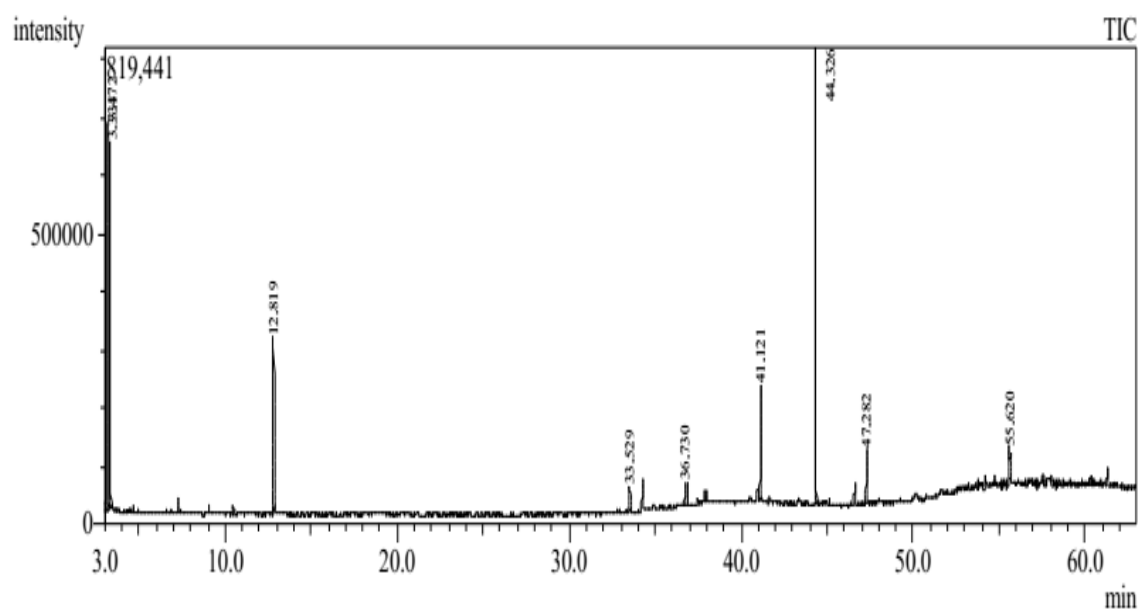

| Peak Report TIC |        |         |       |                                                                  |          |
|-----------------|--------|---------|-------|------------------------------------------------------------------|----------|
| Peak#           | R.Time | Area    | Area% | Name                                                             | Base m/z |
| 1               | 3.172  | 1266869 | 18.68 | 2,3-Butanediol, [S-(R*,R*)]-                                     | 45.10    |
| 2               | 3.334  | 1137950 | 16.78 | 2,3-Butanediol, [S-(R*,R*)]-                                     | 45.10    |
| 3               | 12.819 | 854510  | 12.60 | Dehydromevalonic lactone                                         | 82.05    |
| 4               | 33.529 | 117759  | 1.74  | Hexadecanoic acid, methyl ester                                  | 87.10    |
| 5               | 36.730 | 106851  | 1.58  | 9,12-Octadecadien-1-ol, (Z,Z)-                                   | 95.15    |
| 6               | 41.121 | 587929  | 8.67  | 13-Docosenamide, (Z)-                                            | 59.05    |
| 7               | 44.326 | 2233614 | 32.94 | Bis(2-ethylhexyl) phthalate                                      | 149.00   |
| 8               | 47.282 | 286447  | 4.22  |                                                                  | 307.10   |
| 9               | 55.620 | 189480  | 2.79  | Card-20(22)-enolide, 3,5,14,19-tetrahydroxy-, (3.beta.,5.beta.)- | 95.10    |

**Supplementary S2.** GC mass chromatogram of *Aspergillus fumigatus* sp. WA7S6
